# Supplementary material for: Metabarcoding Markers for Identifying Zooplankton and Ichthyoplankton Communities to Species in the Salish Sea: Morphological Comparisons and Rare, Threatened or Invasive Species
Source: Preprints.org preprint supplement (doi:10.20944/preprints202310.0254.v1), 2023-10-05
Supplement: Supplementary file 1 [file supplementary]

# Supplementary Table 1. Metabarcoding markers and gene regions, references, primer sequences, approximate target sequence length, and PCR parameters

#

| **Metabarcoding**  **marker name**  (gene region) | **Marker**  **and reference(s)** | **Forward**  **primer** | **Reverse**  **primer** | **Target sequence length**  (*N* nucleotides) | **PCR anneal  temperature** (oCelsius) | ***N* PCR cycles** |
| --- | --- | --- | --- | --- | --- | --- |
| LrCOI  (mitochondrial *cytochrome c oxidase I*) | Leray *et al.* (2013) [48];  Geller *et al.* (2013) [49] | GGWACWGGWTGAACWGTWTAYCCYCC | TAIACYTCIGGRTGICCRAARAAYCA | 313 | 55 | 35 |
| Cop16S  (mitochondrial *16S ribosomal RNA*) | Clarke *et al.* (2017)  [54] | TAAGGTAGCATARTAATTWG | TAATTCAACATCGAGGTC | 125–185 | 45 | 35 |
| Mol16S  (mitochondrial *16S ribosomal RNA*) | Klymus *et al.* (2017) [36] | RRWRGACRAGAAGACCCT | ARTCCAACATCGAGGT | 125–185 | 58 | 35 |
| MiFish12S  (mitochondrial *12S ribosomal RNA*) | Miya *et al.* (2015)  [58] | GTCGGTAAAACTCGTGCCAGC | CATAGTGGGGTATCTAATCCCAGTTTG | 172  (163–185) | 65 | 35 |
| FishCytb  (mitochondrial *cytochrome b*) | Snyder and Stepien (2020) [61];  Snyder *et al.* (2020) [62] | GCCTACGCYATYCTHCGMTCHATYCC | GGGTGTTCNACNGGYATNCCNCCAATTCA | 154 | 50 | 35 |

**Supplemetary Table 2.** **Total number of reads (pairs and single reads post-merge) at each step in the quality control pipeline.**

| **Marker and Sample** | **Raw**  **read pairs** | **Cutadapt**  **adaptor**  **trim pairs** | **DADA2 quality**  **filter pairs** | **DADA2**  **merged**  **reads** | **DADA2**  **non-chimeric**  **reads** | **% Reads**  **retained** |
| --- | --- | --- | --- | --- | --- | --- |
| LrCOI_1804_P22_v_BSsG | 150,873 | 149,582 | 135,975 | 121,502 | 115,368 | 76.5 |
| LrCOI_1804_P4_v_BSsG | 101,257 | 100,201 | 90,265 | 85,884 | 79,220 | 78.2 |
| LrCOI_1804_P8_o_BSsG | 108,646 | 107,803 | 95,616 | 88,954 | 85,871 | 79.0 |
| LrCOI_1804_P28_v_BSsG | 156,378 | 154,821 | 139,414 | 129,924 | 125,243 | 80.1 |
| LrCOI_1804_P38_o_BSsG | 133,564 | 132,184 | 119,713 | 112,939 | 107,897 | 80.8 |
| LrCOI_1804_P402_v_BSsG | 121,640 | 120,730 | 116,599 | 111,413 | 89,640 | 73.7 |
| LrCOI_1804_P12_v_BSsG | 144,158 | 142,748 | 129,061 | 124,594 | 119,720 | 83.0 |
| LrCOI_1809_P22_v_BSsG | 127,444 | 126,318 | 109,545 | 102,749 | 96,069 | 75.4 |
| LrCOI_1809_P8_o_BSsG | 87,162 | 86,450 | 76,048 | 71,877 | 67,898 | 77.9 |
| LrCOI_1809_P38_o_BSsG | 122,167 | 121,178 | 111,784 | 105,531 | 101,428 | 83.0 |
| Cop16S_1809_P22_v_BSsF | 137,205 | 136,193 | 133,616 | 131,032 | 128,862 | 93.9 |
| Cop16S_1809_P8_v_BSsF | 202,613 | 201,185 | 197,483 | 190,517 | 187,912 | 92.7 |
| Cop16S_1809_P28_v_BSsF | 90,101 | 89,543 | 88,037 | 86,085 | 85,810 | 95.2 |
| Cop16S_1809_P38_v_BSsF | 174,617 | 173,419 | 169,535 | 165,757 | 164,272 | 94.1 |
| Cop16S_1809_P38_o_BSsF | 168,079 | 165,725 | 158,603 | 156,161 | 155,122 | 92.3 |
| Cop16S_1809_P402_v_BSsF | 96,453 | 95,784 | 93,519 | 92,727 | 92,666 | 96.1 |
| Cop16S_1809_P12_v_BSsF | 138,550 | 137,047 | 133,197 | 132,113 | 131,319 | 94.8 |
| Mol16S_1804_P22_v_BS20 | 340,156 | 318,984 | 307,240 | 303,699 | 289,206 | 85.0 |
| Mol16S_1804_P4_v_A_KAsH | 88,068 | 54,754 | 48,913 | 44,689 | 42,708 | 48.5 |
| Mol16S_1804_P4_v_BS20 | 210,286 | 198,775 | 187,630 | 175,458 | 164,106 | 78.0 |
| Mol16S_1804_P8_v_BS20 | 273,904 | 256,405 | 246,976 | 242,168 | 225,155 | 82.2 |
| Mol16S_1804_P28_v_BS20 | 172,836 | 163,125 | 154,473 | 150,052 | 134,945 | 78.1 |
| Mol16S_1804_P402_v_BS20 | 411,653 | 391,621 | 382,218 | 380,908 | 377,995 | 91.8 |
| Mol16S_1804_P12_v_BS20 | 281,659 | 264,924 | 245,339 | 237,723 | 234,648 | 83.3 |
| Mol16S_1809_P4_v_BSsF | 75,496 | 74,452 | 72,799 | 72,481 | 72,194 | 95.6 |
| Mol16S_1809_P4_v_BS20 | 120,707 | 112,828 | 104,191 | 102,302 | 101,328 | 83.9 |
| Mol16S_1809_P8_v_BS20 | 261,369 | 245,141 | 235,881 | 233,083 | 224,636 | 85.9 |
| Mol16S_1809_P8_o_BSsF | 107,398 | 105,762 | 104,281 | 103,382 | 102,581 | 95.5 |
| Mol16S_1809_P28_v_BS20 | 284,093 | 264,123 | 252,036 | 248,801 | 241,705 | 85.1 |
| Mol16S_1809_P38_v_BSsF | 54,579 | 53,981 | 53,073 | 51,898 | 51,156 | 93.7 |
| Mol16S_1809_P38_v_BS20 | 371,415 | 347,162 | 329,333 | 325,487 | 315,458 | 84.9 |
| Mol16S_1809_P38_o_BSsF | 193,581 | 191,306 | 187,602 | 182,944 | 179,128 | 92.5 |
| Mol16S_1809_P402_v_BSsF | 107,610 | 106,323 | 103,254 | 102,650 | 102,441 | 95.2 |
| Mol16S_1809_P402_v_BS20 | 146,364 | 136,669 | 128,173 | 126,414 | 121,454 | 83.0 |
| Mol16S_1809_P12_v_BSsF | 69,173 | 68,317 | 67,517 | 67,084 | 66,351 | 95.9 |
| Mol16S_1809_P12_v_BS20 | 265,703 | 240,887 | 212,225 | 207,240 | 197,702 | 74.4 |
| Mol16S_FB_1804_P22_v_BS20 | 243,775 | 228,289 | 220,530 | 218,162 | 212,268 | 87.1 |
| Mol16S_FB_1804_P4_v_BS20 | 175,305 | 165,465 | 157,998 | 150,335 | 143,039 | 81.6 |
| Mol16S_FB_1804_P8_v_BS20 | 168,262 | 157,248 | 152,275 | 149,901 | 142,989 | 85.0 |
| Mol16S_FB_1804_P28_v_BS20 | 127,931 | 120,053 | 114,586 | 113,152 | 107,279 | 83.9 |
| Mol16S_FB_1804_P38_v_BSsH | 132,895 | 131,252 | 127,581 | 126,125 | 116,578 | 87.7 |
| Mol16S_FB_1804_P402_v_BS20 | 219,543 | 208,861 | 204,141 | 203,563 | 202,573 | 92.3 |
| Mol16S_FB_1804_P12_v_BS20 | 209,625 | 197,201 | 185,006 | 183,493 | 183,029 | 87.3 |
| Mol16S_FB_1809_P22_v_BSsH | 122,139 | 120,675 | 119,194 | 118,594 | 116,908 | 95.7 |
| Mol16S_FB_1809_P22_v_BS20 | 273,612 | 257,489 | 248,794 | 245,575 | 229,427 | 83.9 |
| Mol16S_FB_1809_P4_v_BS20 | 266,993 | 249,868 | 237,842 | 232,855 | 221,668 | 83.0 |
| Mol16S_FB_1809_P8_v_BS20 | 188,850 | 176,448 | 165,853 | 162,941 | 156,469 | 82.9 |
| Mol16S_FB_1809_P8_o_BSsH | 127,489 | 124,953 | 113,484 | 111,308 | 109,637 | 86.0 |
| Mol16S_FB_1809_P28_v_BS20 | 296,595 | 278,120 | 268,091 | 265,814 | 262,380 | 88.5 |
| Mol16S_FB_1809_P38_v_BS20 | 177,721 | 166,656 | 157,995 | 155,850 | 151,412 | 85.2 |
| Mol16S_FB_1809_P38_o_BSsH | 114,588 | 113,016 | 109,954 | 108,149 | 106,240 | 92.7 |
| Mol16S_FB_1809_P402_v_BSsH | 98,063 | 96,476 | 93,600 | 92,706 | 91,669 | 93.5 |
| Mol16S_FB_1809_P402_v_BS20 | 167,697 | 157,135 | 148,533 | 146,509 | 140,963 | 84.1 |
| Mol16S_FB_1809_P12_v_BSsH | 52,628 | 51,961 | 50,322 | 49,928 | 48,421 | 92.0 |
| Mol16S_FB_1809_P12_v_BS20 | 211,086 | 194,094 | 186,050 | 183,867 | 174,837 | 82.8 |
| MiFish12S_1804_P22_v_BS20 | 161,912 | 144,423 | 57,662 | 56,608 | 56,224 | 34.7 |
| MiFish12S_1804_P4_v_BS20 | 206,536 | 193,698 | 155,051 | 152,901 | 151,255 | 73.2 |
| MiFish12S_1804_P8_v_BS20 | 270,810 | 247,369 | 84,739 | 83,850 | 83,815 | 30.9 |
| MiFish12S_1804_P28_v_BS20 | 181,119 | 169,663 | 135,577 | 134,064 | 130,997 | 72.3 |
| MiFish12S_1804_P38_v_BS20 | 197,727 | 185,713 | 158,503 | 157,094 | 155,507 | 78.6 |
| MiFish12S_1804_P402_v_BS20 | 180,170 | 166,603 | 86,145 | 85,308 | 85,284 | 47.3 |
| MiFish12S_1804_P12_v_BS20 | 147,083 | 138,556 | 124,580 | 124,145 | 123,226 | 83.8 |
| MiFish12S_1809_P4_v_BS20 | 260,375 | 236,628 | 49,458 | 49,401 | 49,398 | 19.0 |
| MiFish12S_1809_P8_o_BSsE | 49,389 | 49,182 | 48,840 | 48,773 | 48,773 | 98.8 |
| MiFish12S_1809_P38_v_BS20 | 230,787 | 218,826 | 176,369 | 175,660 | 174,276 | 75.5 |
| MiFish12S_1809_P38_o_BSsE | 107,889 | 107,356 | 106,671 | 105,563 | 103,768 | 96.2 |
| FishCytb_1804_P22_v_BSsH | 72,705 | 72,058 | 71,004 | 70,429 | 69,597 | 95.7 |
| FishCytb_1804_P22_v_BS20 | 256,483 | 247,444 | 130,668 | 127,102 | 125,388 | 48.9 |
| FishCytb_1804_P4_v_BSsH | 73,304 | 72,706 | 72,310 | 71,687 | 70,225 | 95.8 |
| FishCytb_1804_P4_v_BS20 | 266,189 | 260,623 | 256,740 | 252,260 | 245,441 | 92.2 |
| FishCytb_1804_P8_v_BS20 | 284,845 | 276,670 | 268,384 | 261,365 | 242,182 | 85.0 |
| FishCytb_1804_P8_o_BSsH | 97,103 | 96,300 | 95,464 | 94,176 | 93,542 | 96.3 |
| FishCytb_1804_P28_v_BSsH | 55,917 | 55,440 | 55,049 | 54,720 | 54,047 | 96.7 |
| FishCytb_1804_P28_v_BS20 | 279,533 | 273,164 | 257,561 | 254,781 | 250,962 | 89.8 |
| FishCytb_1804_P38_o_BSsH | 179,803 | 178,414 | 177,440 | 176,088 | 171,735 | 95.5 |
| FishCytb_1804_P402_v_BS20 | 176,161 | 172,383 | 168,248 | 165,780 | 164,975 | 93.7 |
| FishCytb_1804_P12_v_BSsH | 81,579 | 80,989 | 80,581 | 80,406 | 80,397 | 98.6 |
| FishCytb_1804_P12_v_BS20 | 217,277 | 211,658 | 208,411 | 207,696 | 207,654 | 95.6 |
| FishCytb_1809_P28_v_BS20 | 103,187 | 100,581 | 87,654 | 85,888 | 85,218 | 82.6 |
| FishCytb_1809_P38_v_BSsH | 86,832 | 86,101 | 85,563 | 85,312 | 84,324 | 97.1 |
| FishCytb_1809_P38_v_BS20 | 132,817 | 130,377 | 128,086 | 126,772 | 125,063 | 94.2 |
| FishCytb_1809_P38_o_BSsH | 62,214 | 61,682 | 61,217 | 61,051 | 61,013 | 98.1 |

**Supplementary Table 3. Amplicon sequence variant (ASV) counts for each metabarcoding marker**

| **Metabarcoding marker name**  **(gene region)** | **Total *N* ASVs** | **Total *N* ASVs classified to species  (*N* unique species)** | **Total *N* ASVs classified to genus or species**  **(*N* unique genera + species)** | ***N* Metazoan ASVs** | ***N* Metazoan ASVs classified to species**  **(*N* unique species)** | ***N* Metazoan ASVs classified to genus  or species  (*N* unique genera + species)** |
| --- | --- | --- | --- | --- | --- | --- |
| **LrCOI**  (*mitochondrial cytochrome c oxidase I*) | 1321 | 571  (177) | 680  (140) | 1006 | 560  (167) | 669  (130) |
| **Mol16**S  (*mitochondrial 16S ribosomal RNA)* | 911/1150* | 343/382  (126/129) | 479/538  (134/137) | 813/852 | 338/376  (122/124) | 474/532  (130/132) |
| **Cop16S**  *(mitochondrial 16S  ribosomal RNA)* | 383 | 147  (45) | 167  (41) | 341 | 147  (45) | 167  (41) |
| **MiFish12S**  (*mitochondrial 12S  ribosomal RNA)* | 651 | 41  (23) | 50  (26) | 51 | 37  (20) | 46  (23) |
| **FishCytb**  (*mitochondrial cytochrome b)* | 1261 | 95  (38) | 108  (43) | 432 | 93  (36) | 106  (41) |

*Marker without/with fish blocker

**Supplementary Table 4. Master dataset from Salish Sea metabarcoding and morphological analysis.**

Relative abundances were classified as rare (<1%), low (1–3%), moderate (4–10%), or high (>10%).

[https://docs.google.com/spreadsheets/d/1WJar4d5aY24ofHfLo-4U1b5OyuZzfqF5/edit?usp=sharing&ouid=110850699049183358312&rtpof=true&sd=true](https://urldefense.com/v3/__https:/docs.google.com/spreadsheets/d/1WJar4d5aY24ofHfLo-4U1b5OyuZzfqF5/edit?usp=sharing&ouid=110850699049183358312&rtpof=true&sd=true__;!!K-Hz7m0Vt54!gqFQoZvzqlpiU6aSDTgN_XsCIoiVnTzVZrBugVAbQEuMcT08e6IAjJ6cVigq1Yn1StC6thSgpjQODw$)

(please go to link) Excel file also is attached

**Supplementary Table 5. Species studied in the laboratory and whether or not they were detected in this metabarcoding study.**

| **Species name and authority** | **Common name** | **Detected in  this study** |
| --- | --- | --- |
| *Clupeonella cultriventris* (von Nordmann, 1840) | Black Sea sprat | **yes** |
| *Dreissena rostriformis bugensis* (Andrusov, 1897) | Quagga mussel | no |
| *Dreissena polymorpha* (Pallas, 1771) | Zebra mussel | **yes** |
| *Etheostoma blennioides* Rafinesque, 1819 | Greenside darter | no |
| *Gymnocephalus cernua* (Linnaeus, 1758) | Eurasian ruffe | **yes** |
| *Hypophthalmichthys molitrix* (Valenciennes, 1844) | Silver carp | no |
| *Micropterus dolomieu* Lacepède, 1802 | Smallmouth bass | no* |
| *Neogobius melanostomus* (Pallas, 1814) | Round goby | no |
| *Perca flavescens* (Mitchill, 1814) | Yellow perch | no |
| *Perca fluviatilis* Linnaeus, 1758 | European perch | no |
| *Percina caprodes* (Rafinesque, 1818) | Common logperch | no |
| *Sander vitreus* (Mitchill, 1818) | Walleye | **yes*** |

*= Known from freshwaters and/or estuaries in the Salish Sea and/or NE Pacific region (USGS NAS 2023 [50])

**Supplementary Table 6.** **Assessment of assigned sequence variants (ASVs) to putative nonindigenous species.** *Best percent identity (PID) to putative nonindigenous species. Range shown for multi-ASV taxa. FB=results with fish blocker primer. N/A=Not Available.

| **Marker:Putative nonindigenous species** | ***N* ASVs** | **Total Reads** (Rel. Abund. Range) | ***N***  **Unique Samples** | **PID* to putative nonindigenous species** | **Next closest hit species name** (**PID)** | **Potential local species**  (marker genes available for comparison) | **Confidence** (reason) |
| --- | --- | --- | --- | --- | --- | --- | --- |
| **LrCOI***:  Proceraea okadai* | 1 | 14  (0.02) | 1 | 99.7 | *Proceraea nigropunctata* (86.6) | *Proceraea hanssoni* (16S, COI),  *Proceraea nigropuncatata*  (16S, COI) | **High** (High PID match, no close hit to local species) |
| **Mol16S***: Proceraea okadai* | 1 | 7  (0.01) | 1 | 98.9 | *Proceraea nigropunctata* (91.6) |
| **Mol16S_FB***: Proceraea okadai* | 1 | 11  (0.01) | 1 | 98.9 | *Proceraea nigropunctata* (91.6) |
| **FishCytb***: Hediste diadroma* | 1 | 12  (0.01) | 1 | 100 | *Hediste japonica* (84.3) | *Hediste limnicola*  (16S, no cytb) | **High** (High PID match, no close hit for local species) |
| **Mol16S***:  Hediste diadroma* | 1 | 12 (<0.01) | 2 | 100 | *Hediste japonica* (96.1) |
| **Mol16S_FB***: Hediste diadroma* | 1 | 89 (<0.01-0.03) | 3 | 100 | *Hediste japonica* (96.1) |
| **Cop16S***: Leonardsaxius amurensis* | 1 | 36  (0.02) | 1 | 97.6 | *Eiconaxius borradailei* (83.3) | *Leonardsaxius spinulicauda*  (no 16S) | **Low** (Low rRNA PID match, no marker reference for local species) |
| **Mol16S***: Leonardsaxius amurensis* | 1 | 24  (0.01) | 1 | 97.1 | *Pugnatrypaea pugnatrix* (91.5) |
| **LrCOI***:*  *Crangon crangon* | 1 | 30  (0.04) | 1 | 97.3 | *Crangon septemspinosa* (94.0) | *Crangon alaskensis* (COI, no 16S), *Crangon alba* (no COI or 16S),  *Crangon dalli* (no COI or 16S), *Crangon franciscorum* (COI, no 16S), *Crangon nigricauda* (no COI or 16S), *Crangon holmesi* (no COI or 16S), *Crangon lockingtonii* (no COI or 16S), *Crangon nigromaculata* (no COI or 16S),  *Crangon capensis* (no COI or 16S) | **Low** (High PID match, no 16S and limited COI reference for local species) |
| **Cop16S***: Crangon crangon* | 2 | 185 (<0.01-0.18) | 4 | 99.1 | *Neocrangon sagamiensis* (93.4) |
| **Mol16S***: Lucinoma borealis* | 3 | 2399 (0.53-1.28) | 3 | 97.1-97.8 | N/A | *Lucinoma annulata*  (no 16S) | **Low** (Low rRNA PID match, no marker ref. for local species) |
| **Mol16S_FB***: Lucinoma borealis* | 2 | 2914 (0.37-2.15) | 2 | 97.8 | N/A |
| **Mol16S***: Dreissena polymorpha* | 3 | 500 (<0.01-0.46) | 6 | 99.4-100 | *Dreissena presbensis* (96.1) | No local species, invasive throughout much of North America, multiple introductions from the Ponto-Caspian region [50] | **High** (High PID match, no known local species) |
| **Mol16S_FB***: Dreissena polymorpha* | 7 | 8682 (0.05-7.46) | 8 | 98.3-100 | *Dreissena presbensis* (96.1) |
| **FishCytb***:Alosa sapidissima* | 1 | 129 (0.06) | 1 | 100 | *Alosa alabamae* (99.4) | No known local species, introduced to San Francisco Bay and Salish Sea [50] | **High** (High PID match, no known local species) |
| **FishCytb***: Liparis ochotensis* | 2 | 462 (0.01-0.55) | 3 | 98.7-99.4 | *Liparis liparis* (94.8) | *Liparis adiastol* (no cytb), *Liparis callyodon* (no cytb), *Liparis cyclopus* (no cytb), *Liparis dennyi* (cytb), *Liparis florae* (cytb), *Liparis fucensis* (no cytb), *Liparis greeni* (no cytb), *Liparis mucosus* (cytb), *Liparis pulchellus* (cytb) | **Low** (High PID match, only 44% of potential local species have marker reference sequences) |
| **Mol16S***: Cryptacanthodes bergi* | 1 | 376 (0.16-0.25) | 2 | 99.3 | *Cryptacanthodes giganteus* (98.6) | *Cryptacanthodes aleutensis* (no 16S), *Cryptacanthodes giganteus* (16S) | **Low** (High PID match, only one of the two local species has marker reference) |
| **Mol16S_FB***: Cryptacanthodes bergi* | 1 | 98  (0.07) | 1 | 99.3 | *Cryptacanthodes giganteus* (98.6) |

**Supplementary Figures**

**Supplementary Figure 1. Taxonomic and read count/relative abundance information viewed through Krona plot hierarchical data browsers.** doi:[10.6084/m9.figshare.21791738](https://doi.org/10.6084/m9.figshare.21791738)).

**Supplementary Figure 2A.** **Decapoda Crustacea species resolved by morphology and/or four metabarcoding markers.**

Filled circles denote presence, empty circles indicate that the taxon was not detected, and missing circles show lack of resolution for that method.

**Supplementary Figure 2B.** **Cnidaria species resolved by morphology and/or four metabarcoding markers.**

Filled circles denote presence, empty circles indicate that the taxon was not detected, and missing circles show lack of resolution for that method.

**Supplementary Figure 2C.** **Echinodermata species resolved by morphology and/or three invertebrate metabarcoding markers.**

Filled circles denote presence, empty circles indicate that the taxon was not detected, and missing circles show lack of resolution for that method.

**Supplementary Figure 2D.** **Gastropoda Mollusca species resolved by morphology and/or three metabarcoding markers.**

Filled circles denote presence, empty circles indicate that the taxon was not detected, and missing circles show lack of resolution for that method.

**Supplementary Figure 2E.** **Actinopterygii (Teleostei) fish species resolved by morphology and/or four metabarcoding markers.**

Filled circles denote presence, empty circles indicate that the taxon was not detected, and missing circles show lack of resolution for that method.

**Supplementary Figure 3. Proportion of Arthropoda species carbon biomass versus proportion of Arthropoda sequence reads from metabarcoding marker LrCOI**

Regression fit *R*2, with adjusted *p*-values for multiple comparisons [per 92], and Pearson correlation (*r*) coefficients indicated.

**Supplementary Figures**

**Supplementary Figure 1. Taxonomic and read count/relative abundance information viewed through Krona plot hierarchical data browsers.** doi:[10.6084/m9.figshare.21791738](https://doi.org/10.6084/m9.figshare.21791738)).

**Supplementary Figure 2A.** **Decapoda Crustacea species resolved by morphology and/or four metabarcoding markers.**

Filled circles denote presence, empty circles indicate that the taxon was not detected, and missing circles show lack of resolution for that method.

**Supplementary Figure 2B.** **Cnidaria species resolved by morphology and/or four metabarcoding markers.**

Filled circles denote presence, empty circles indicate that the taxon was not detected, and missing circles show lack of resolution for that method.

**Supplementary Figure 2C.** **Echinodermata species resolved by morphology and/or three invertebrate metabarcoding markers.**

Filled circles denote presence, empty circles indicate that the taxon was not detected, and missing circles show lack of resolution for that method.

**Supplementary Figure 2D.** **Gastropoda Mollusca species resolved by morphology and/or three metabarcoding markers.**

Filled circles denote presence, empty circles indicate that the taxon was not detected, and missing circles show lack of resolution for that method.

**Supplementary Figure 2E.** **Actinopterygii (Teleostei) fish species resolved by morphology and/or four metabarcoding markers.**

Filled circles denote presence, empty circles indicate that the taxon was not detected, and missing circles show lack of resolution for that method.

**Supplementary Figure 3. Proportion of Arthropoda species carbon biomass versus sequence reads (merged ASVs for that species) from metabarcoding marker LrCOI**

Regression fit *R*2, with adjusted *p*-values for multiple comparisons [per 92], and Pearson correlation (*r*) coefficients indicated.

**
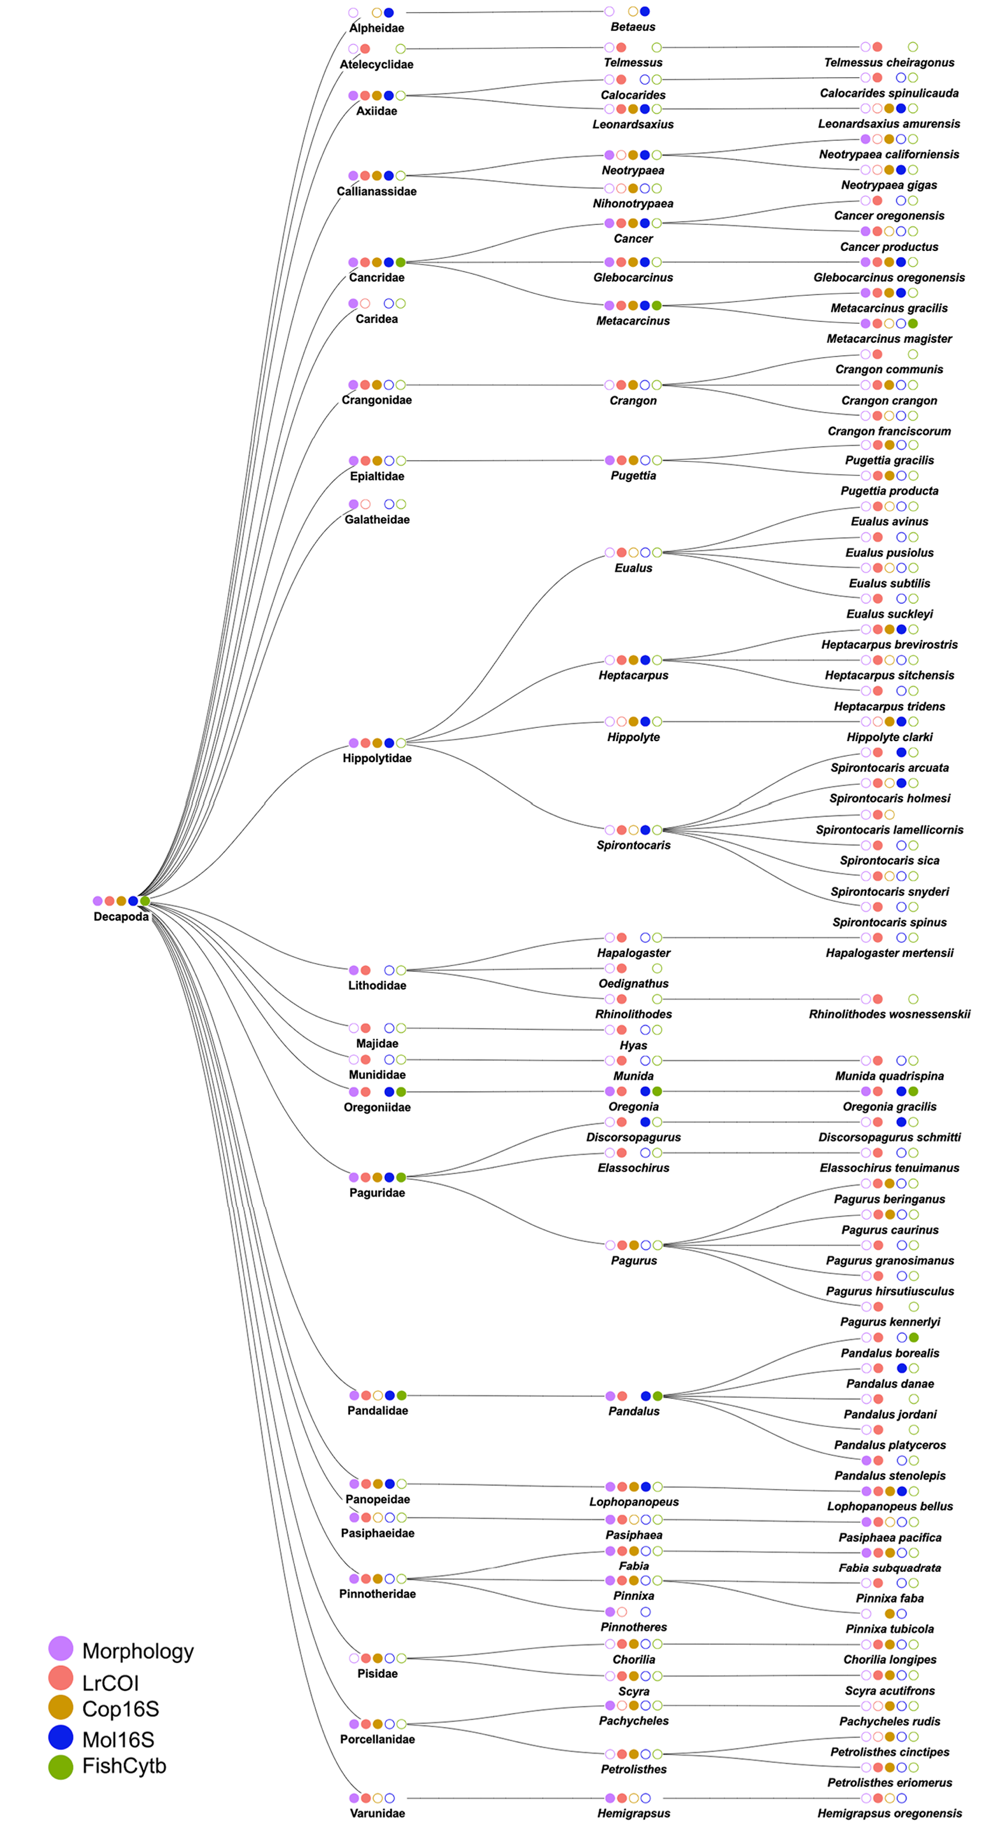
**

**Supplementary Figure 2A.** **Decapoda Crustacea species resolved by morphology and/or four metabarcoding markers.**

Filled circles denote identification, empty circles indicate that the taxon was not detected, and missing circles show lack of resolution for that method.

**
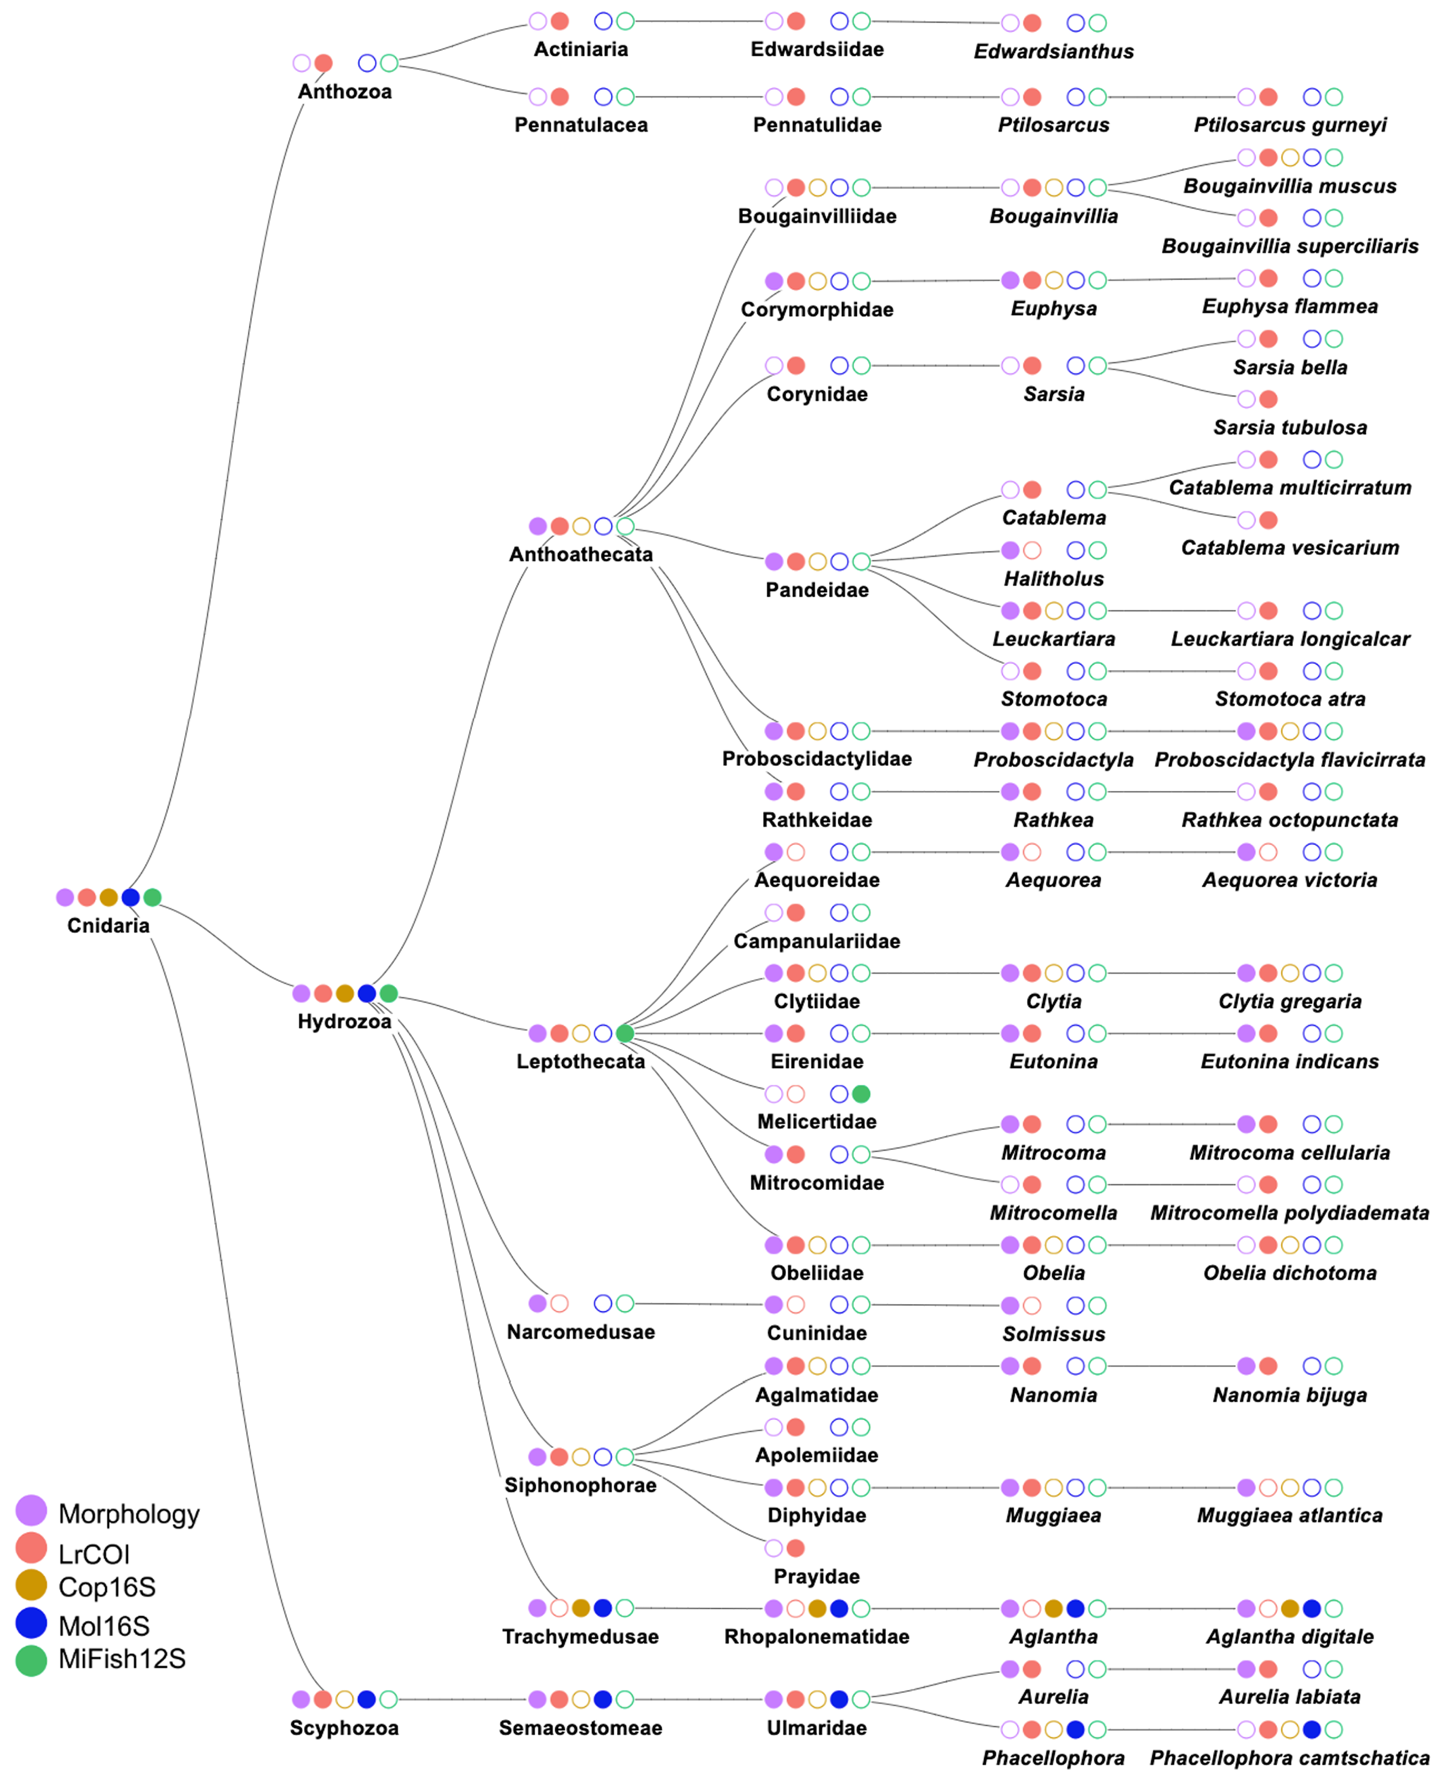
**

**Supplementary Figure 2B.** **Cnidaria species resolved by morphology and/or four metabarcoding markers.**

Filled circles denote identification, empty circles indicate it was not detected, and missing circles show lack of resolution by that method.


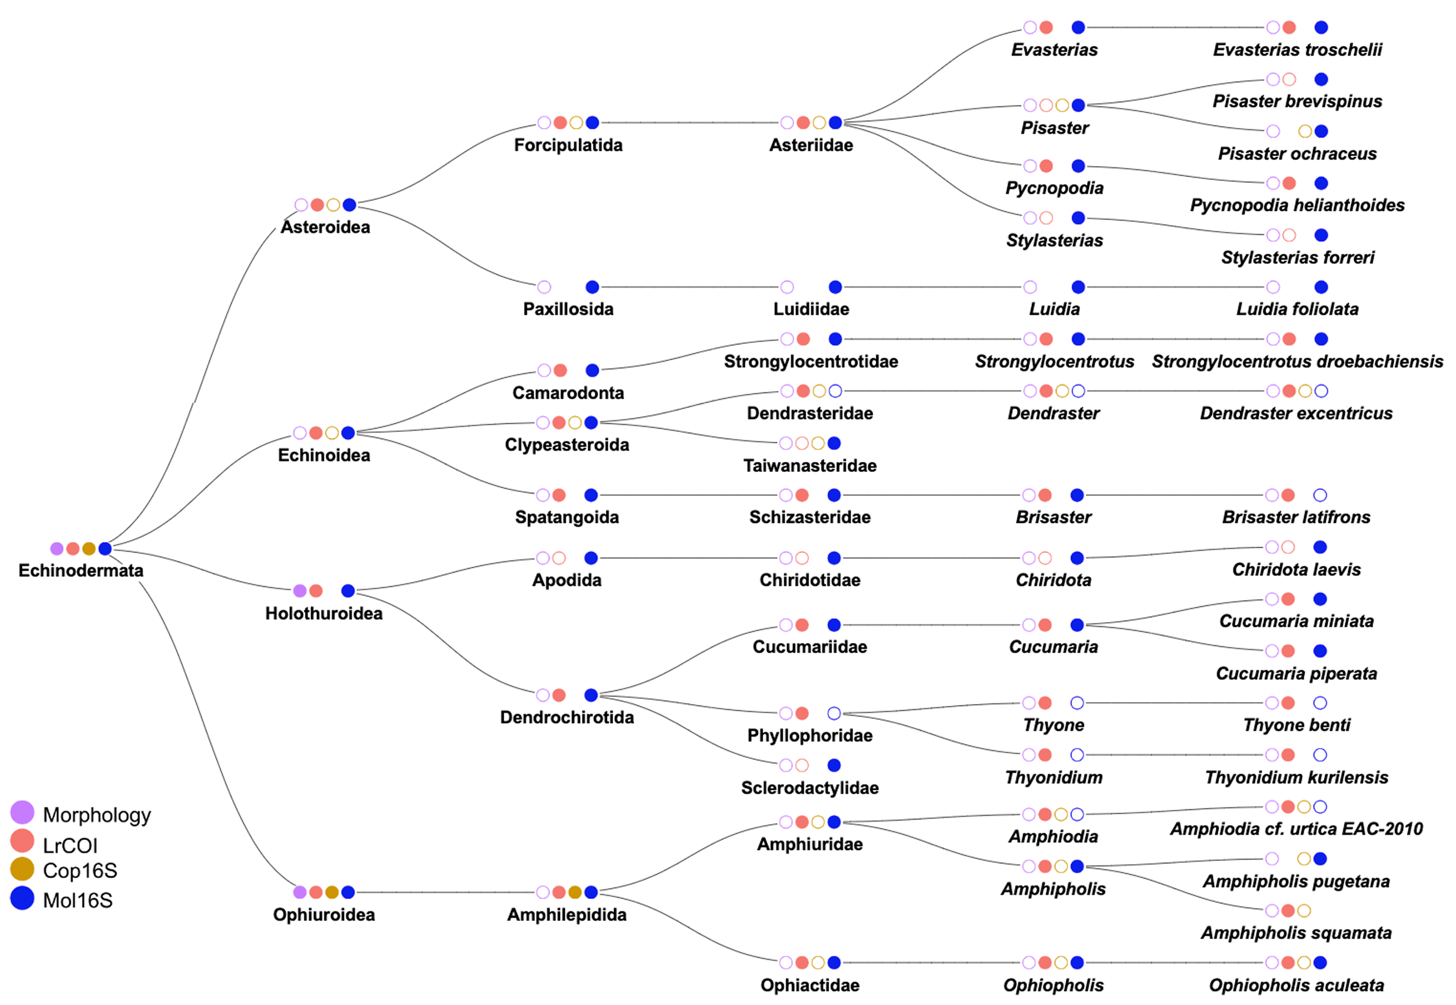


**Supplementary Figure 2C.** **Echinodermata species resolved by morphology and/or three invertebrate metabarcoding markers.**

Filled circles denote presence, empty circles indicate that the taxon was not detected, and missing circles show lack of resolution for that method.


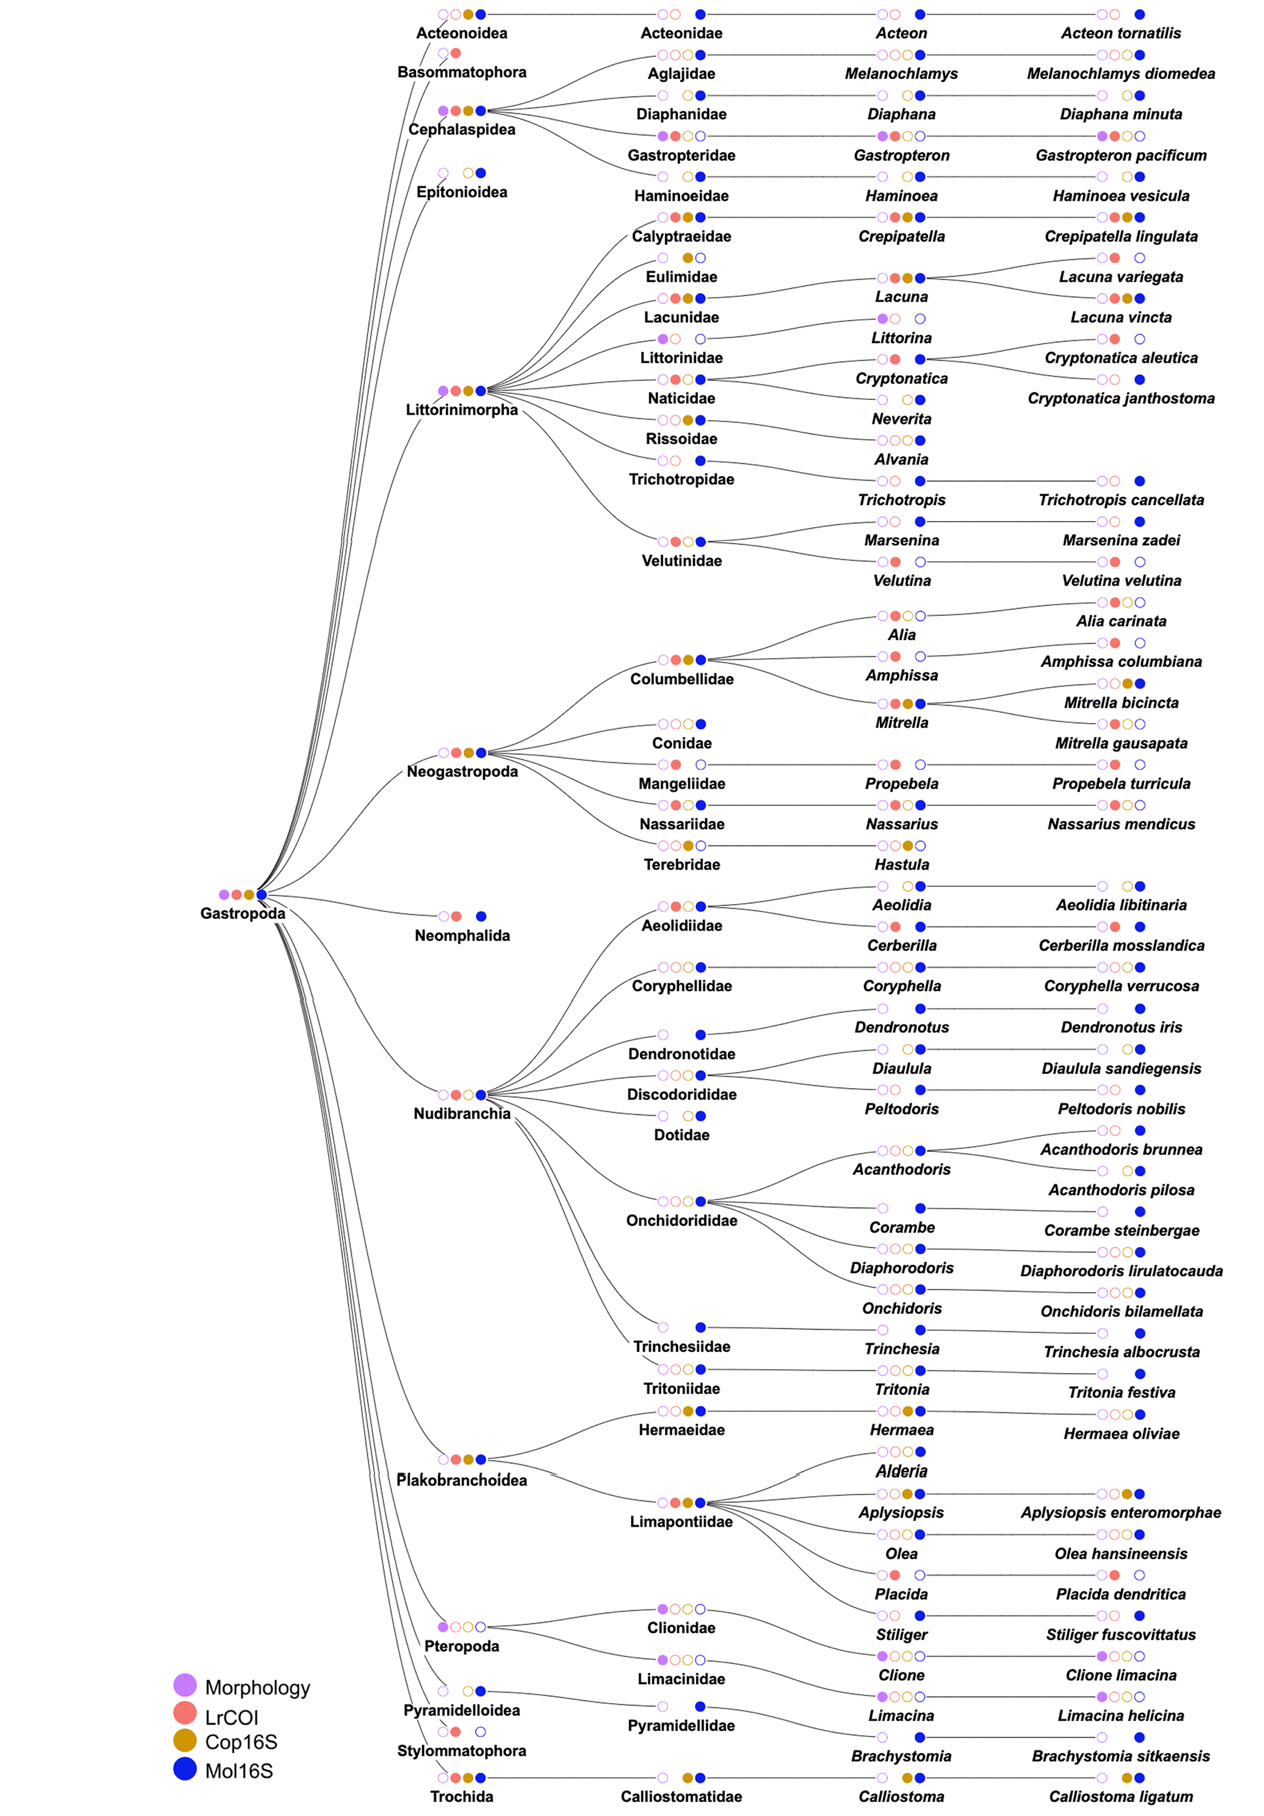

**Supplementary Figure 2D.** **Gastropoda Mollusca species resolved by morphology and/or three metabarcoding markers.**Filled circles denote presence, empty circles indicate that the taxon was not detected, and missing circles show lack of resolution for that method.

**
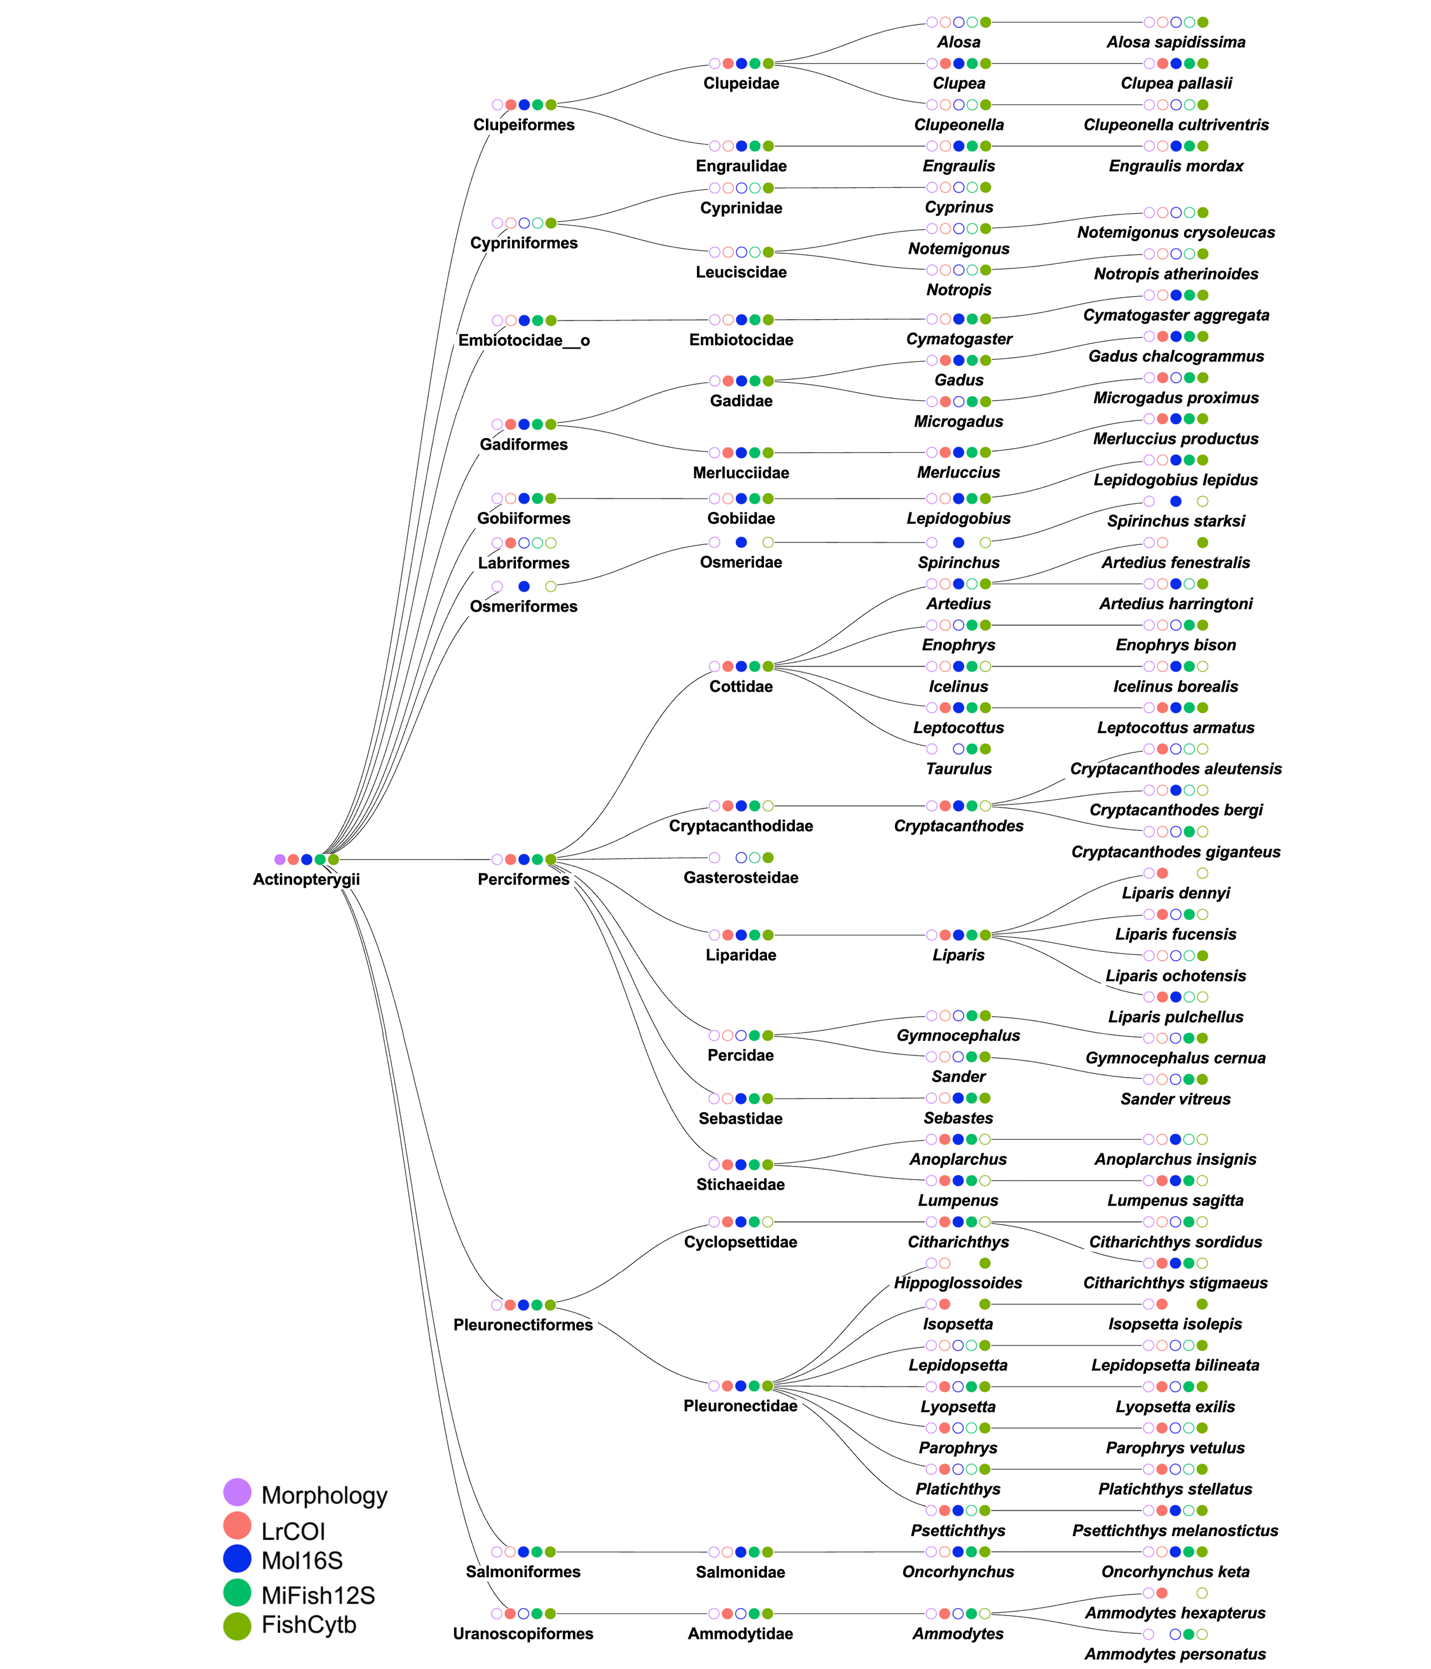
**

**Supplementary Figure 2E.** **Actinopterygii (Teleostei) fish species resolved by morphology and/or four metabarcoding markers.**

Filled circles denote presence, empty circles indicate that the taxon was not detected, and missing circles show lack of resolution for that method.

**
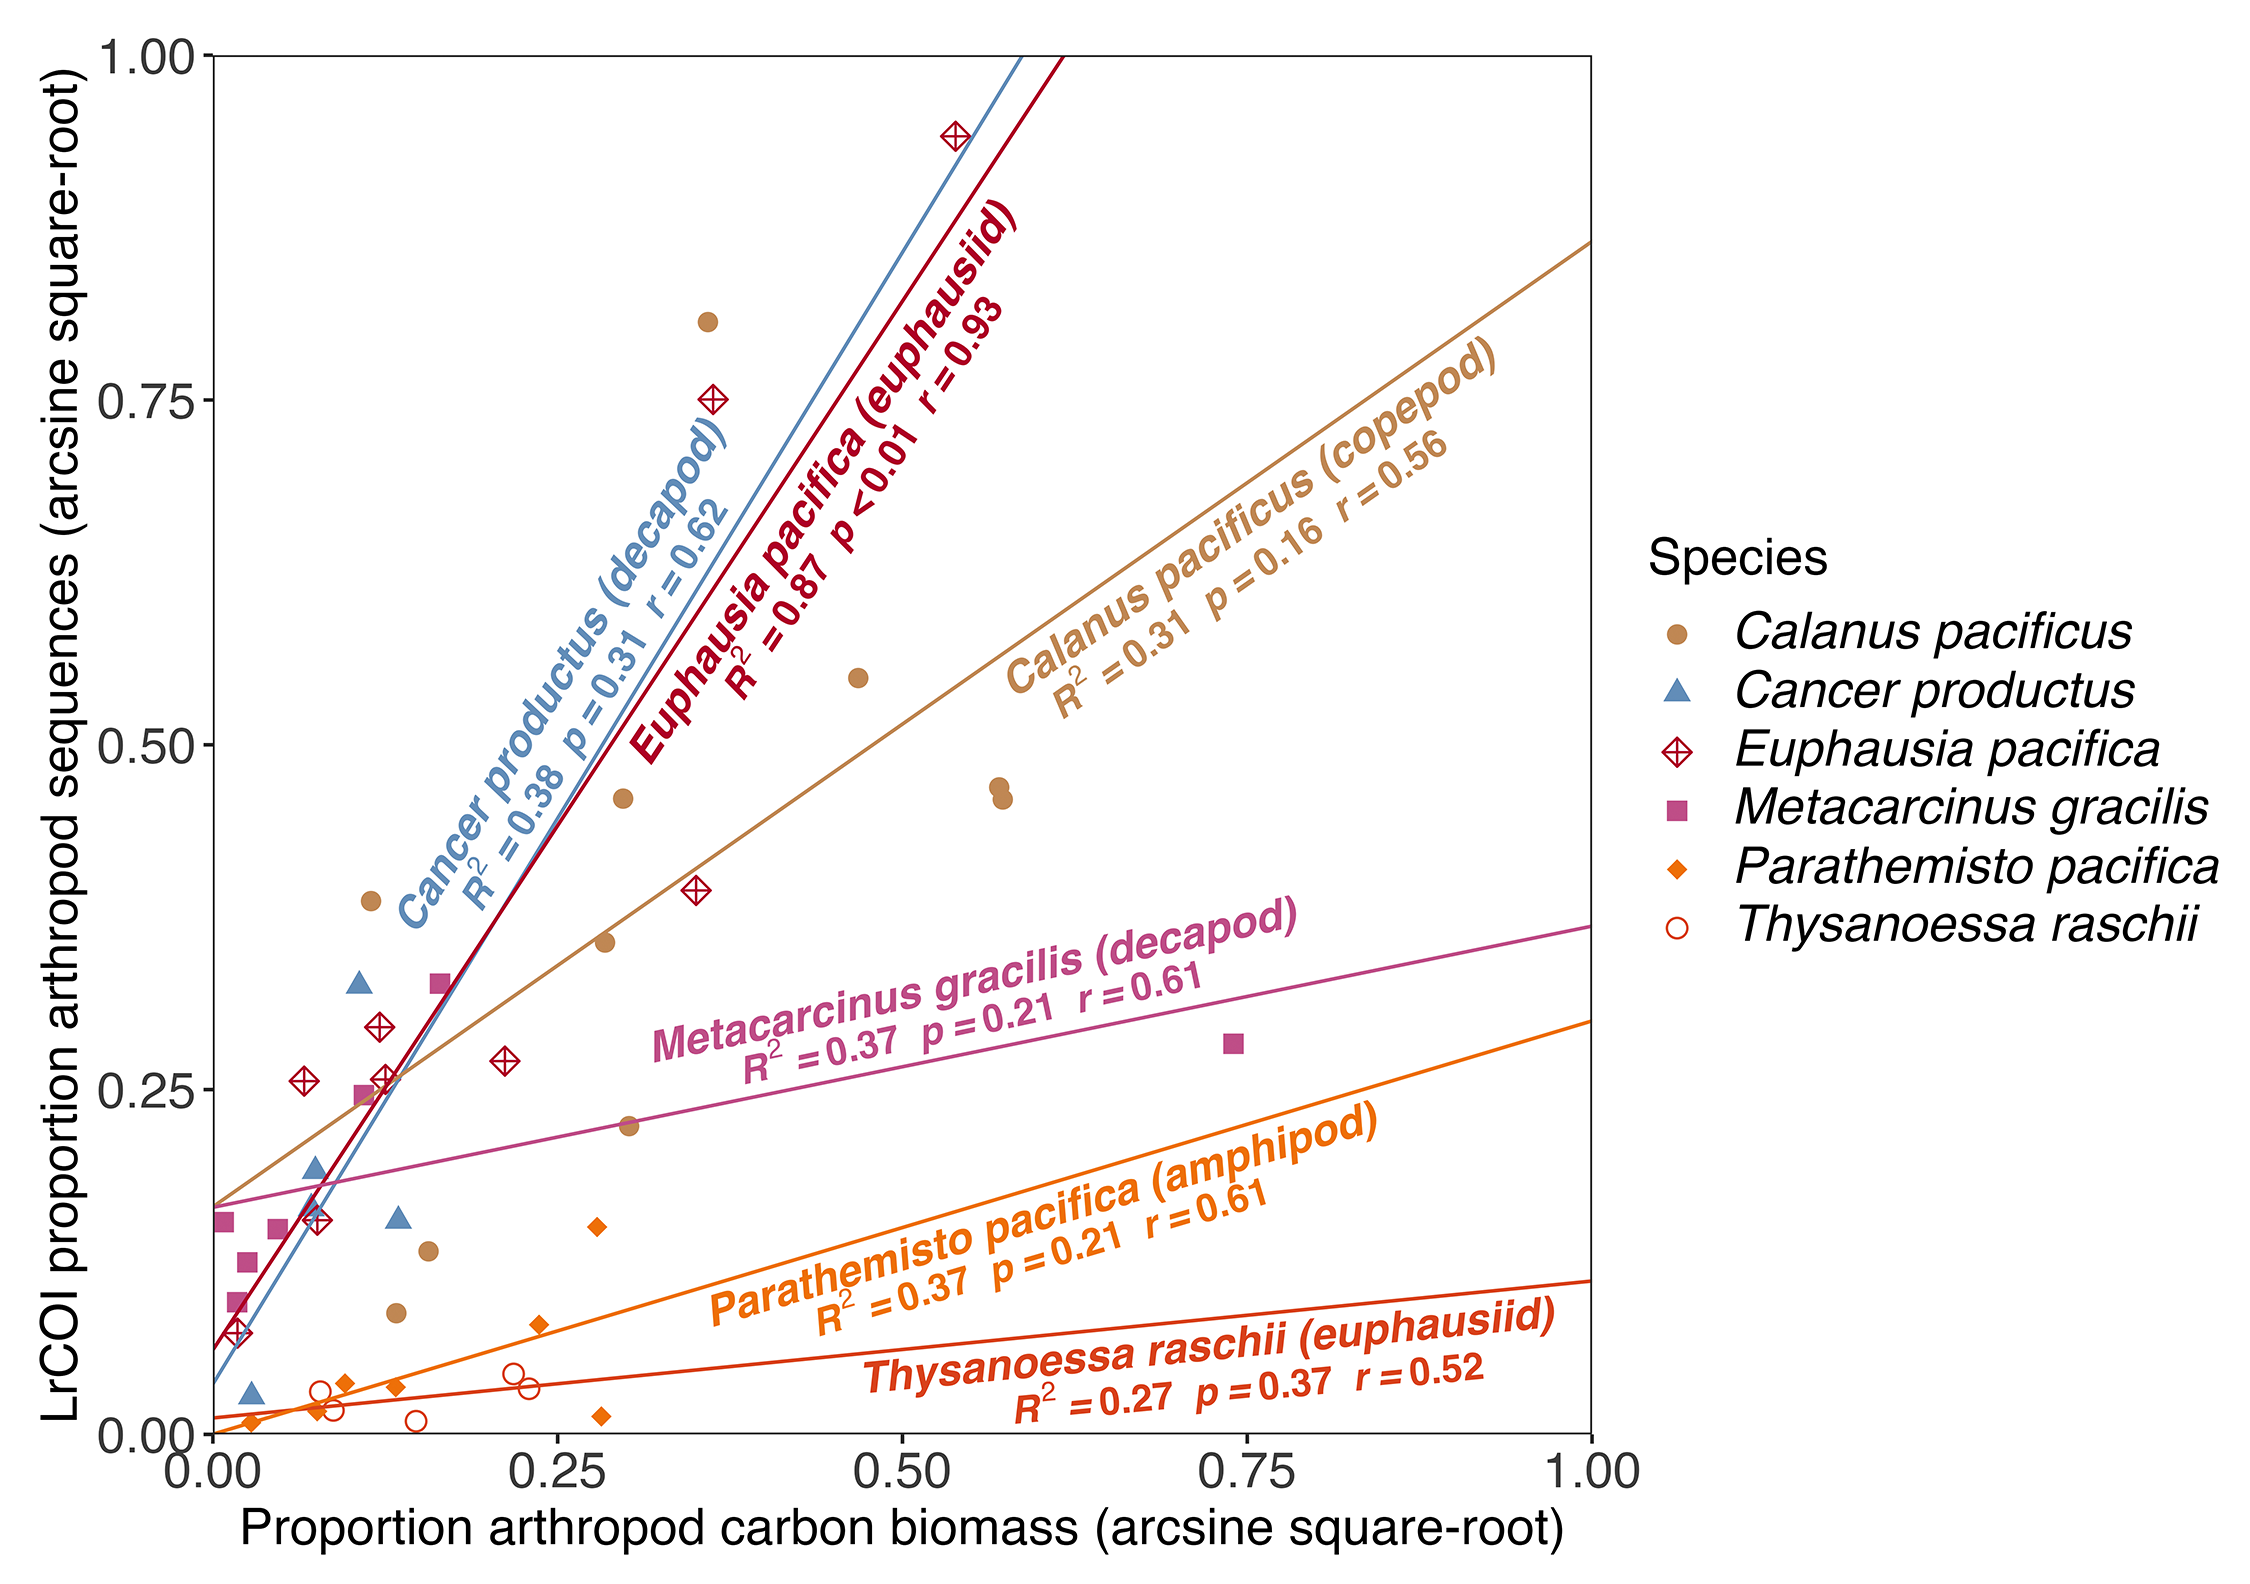
**

**Supplementary** **Figure 3. Proportion of Arthropoda species carbon biomass versus proportion of sequence reads (ASVs merged per species) from metabarcoding marker LrCOI.**

Regression fit *R*2, with adjusted *p*-values for multiple comparisons [per 92], and Pearson correlation (*r*) coefficients indicated.
